# Supplementary material for: Prognostic impact of ABCA3 expression in adult and pediatric acute myeloid leukemia: an ALFA-ELAM02 joint study
Source: PubMed Central journal article supplement — Blood Adv. 2022 May 2;6(9):2773–7. doi: 10.1182/bloodadvances.2021006040 (PMC9092411; doi:10.1182/bloodadvances.2021006040), 2022-05-02
Supplement: advancesADV2021006040-suppl1.pdf [file advancesADV2021006040-suppl1.pdf]

## SUPPLEMENTAL DATA

|                                  | Exploratory set (N=120) | Validation set (N=150) | p-value       |
|----------------------------------|-------------------------|------------------------|---------------|
| <b>Clinical features</b>         |                         |                        |               |
| Median age (years), range        | 9.4 [0.2 - 17.2]        | 10 [0.4 - 17.9]        | 0.97          |
| M/F ratio                        | 1.26                    | 1.27                   | 1.00          |
| Median WBC (G/L), range          | 19.3 [1.2 - 575]        | 13.6 [1.3 - 514]       | 0.10          |
| Median medullar blast percentage | 73.5% [1 - 98]          | 65% [1 - 99]           | 0.23          |
| CNS involvement                  | 22 (18%)                | 22 (15%)               | 0.51          |
| <b>Cytogenetics</b>              |                         |                        |               |
| Normal karyotype                 | 39 (32%)                | 37 (25%)               | 0.18          |
| CBF-AML                          | 20 (16.7%)              | 54 (36%)               | <b>0.0005</b> |
| <i>KMT2A</i> rearranged-AML      | 20 (16.7%)              | 33 (22%)               | 0.29          |
| <b>Anomalies moléculaires</b>    |                         |                        |               |
| <i>FLT3</i> -ITD                 | 12 (10%)                | 18 (12%)               | 0.70          |
| <i>NPM1</i> muté                 | 14 (12%)                | 8 (5%)                 | 0.07          |
| <i>CEBPA</i> double-mutation     | 2 (2%)                  | 4 (3%)                 | 0.70          |
| <b>Risk stratification</b>       |                         |                        |               |
| Standard risk                    | 20 (17%)                | 55 (36%)               | <b>0.001</b>  |
| Intermediate risk                | 77 (64%)                | 67 (45%)               | <b>0.002</b>  |
| High risk                        | 23 (19%)                | 28 (19%)               | 1.0           |
| <b>Results</b>                   |                         |                        |               |
| CR                               | 108 (90%)               | 145 (97%)              | <b>0.04</b>   |
| Relapse                          | 33/108 (31%)            | 54/145 (37%)           | 0.29          |
| HSCT                             | 38 (32%)                | 41 (27%)               | 0.50          |
| 5-years OS $\pm$ SE              | 70.8% $\pm$ 5.1%        | 77.2% $\pm$ 4.1%       | 0.33          |
| 5-years LFS $\pm$ SE             | 62.0% $\pm$ 5.9%        | 56.7% $\pm$ 5.1%       | 0.44          |

**Supplementary Table 1. Main clinical and biological features of the exploratory (N=120) and the validation (N=150) sets.** Fisher's exact tests were used for comparing categorical variables, Mann-Whitney's tests for numerical variables and log-rank tests for survival variables. *M* (male), *F* (female), *WBC* (white blood cells), *Min* (minimum), *Max* (maximum), *CNS* (central nervous system), *AML* (acute myeloid leukemia), *CBF* (core-binding factor), *ITD* (internal-tandem duplication), *CR* (complete remission rate), *HSCT* (hematopoietic stem cell transplant), *OS* (overall survival), *LFS* (leukemia-free survival), *SE* (standard-error).

| ELAM02                           | High <i>ABCA3</i> expression (N=98) | Low <i>ABCA3</i> expression (N=172) | p-value      |
|----------------------------------|-------------------------------------|-------------------------------------|--------------|
| <b>Clinical features</b>         |                                     |                                     |              |
| Median age (years), range        | 10 [0.16 - 17.2]                    | 9.65 [0.24 - 17.9]                  | 0.56         |
| M/F ratio                        | 1.33                                | 1.23                                | 0.80         |
| Median WBC (G/L), range          | 15 [1.8 - 514]                      | 17 [1.2 - 575]                      | 0.90         |
| Median medullar blast percentage | 74% [1 - 99]                        | 65% [9 - 98]                        | 0.20         |
| CNS involvement                  | 15 (15%)                            | 29 (17%)                            | 0.86         |
| <b>Cytogenetics</b>              |                                     |                                     |              |
| Normal karyotype                 | 28 (29%)                            | 48 (28%)                            | 1.00         |
| CBF-AML                          | 21 (21%)                            | 53 (31%)                            | 0.12         |
| <i>KMT2A</i> rearranged-AML      | 23 (23%)                            | 30 (17%)                            | 0.27         |
| <b>Anomalies moléculaires</b>    |                                     |                                     |              |
| <i>FLT3</i> -ITD                 | 11 (11%)                            | 19 (11%)                            | 1.00         |
| <i>NPM1</i> muté                 | 6 (6%)                              | 16 (9%)                             | 0.49         |
| <i>CEBPA</i> double-mutation     | 1 (1%)                              | 5 (3%)                              | 0.42         |
| <b>Risk stratification</b>       |                                     |                                     |              |
| Standard risk                    | 23 (24%)                            | 55 (32%)                            | 0.05         |
| Intermediate risk                | 55 (56%)                            | 88 (51%)                            | 0.45         |
| High risk                        | 20 (20%)                            | 29 (17%)                            | 0.20         |
| <b>Results</b>                   |                                     |                                     |              |
| CR                               | 85 (87%)                            | 168 (98%)                           | <b>0.001</b> |
| Relapse                          | 42/85 (49%)                         | 50/168 (30%)                        | <b>0.004</b> |
| HSCT                             | 27 (28%)                            | 52 (30%)                            | 0.68         |
| 5-years OS $\pm$ SE              | 65.2% $\pm$ 4.9%                    | 84.3% $\pm$ 3%                      | <b>0.003</b> |
| 5-years LFS $\pm$ SE             | 50.3% $\pm$ 5.6%                    | 67.4% $\pm$ 3.8%                    | <b>0.005</b> |

**Supplementary Table 2. Main clinical and biological features of the high and low *ABCA3* expressers in the entire pediatric dataset (N=270).** Fisher's exact tests were used for comparing categorical variables, Mann-Whitney's tests for numerical variables and log-rank tests for survival variables. *M* (male), *F* (female), *WBC* (white blood cells), *Min* (minimum), *Max* (maximum), *CNS* (central nervous system), *AML* (acute myeloid leukemia), *CBF* (core-binding factor), *ITD* (internal-tandem duplication), *CR* (complete remission), *HSCT* (hematopoietic stem cell transplant), *OS* (overall survival), *LFS* (leukemia-free survival), *SE* (standard-error).

Sup Fig 1

**A**

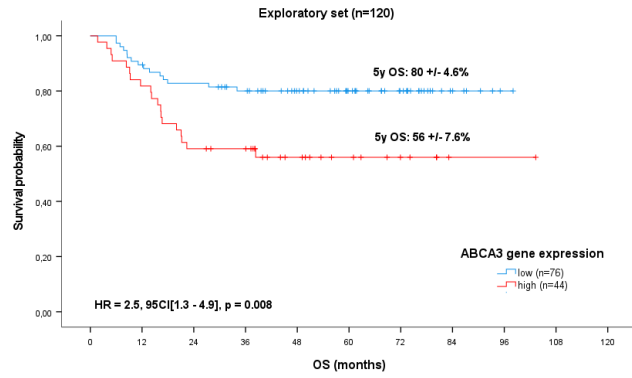

**B**

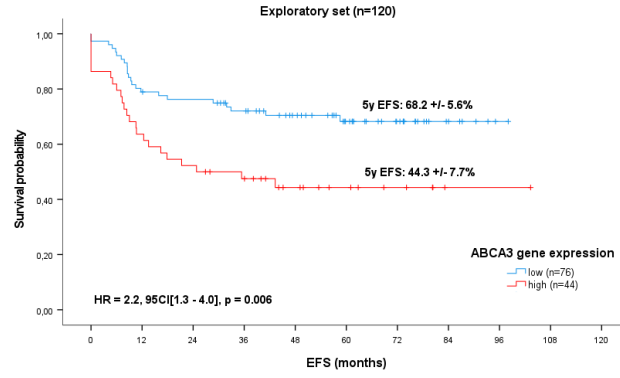

**C**

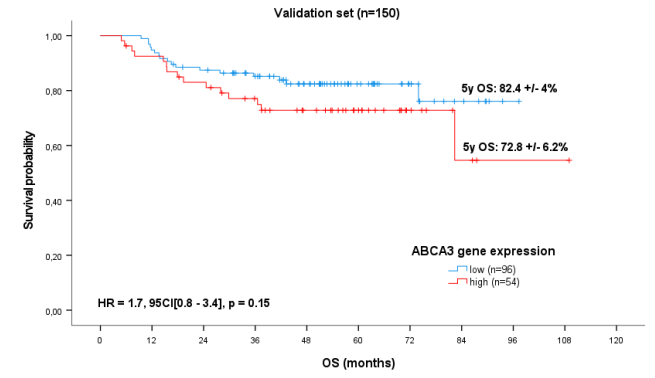

**D**

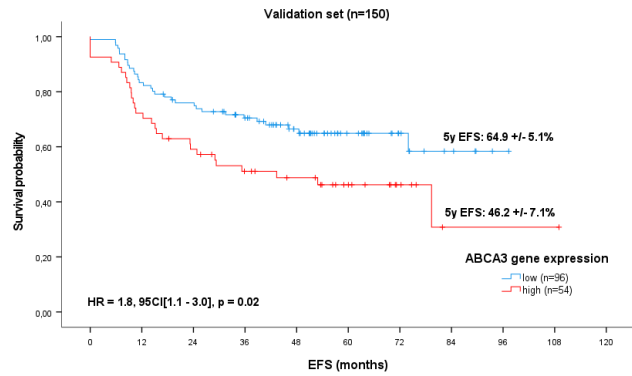

**E**

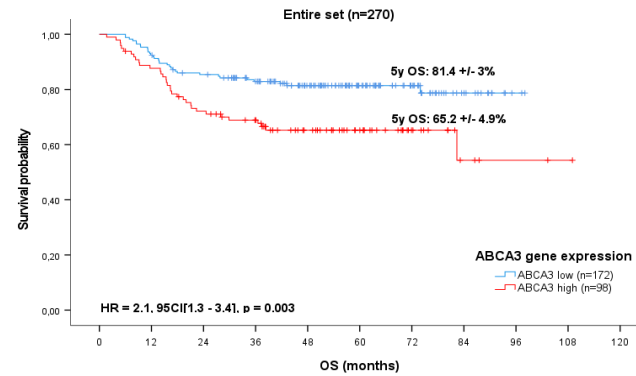

**F**

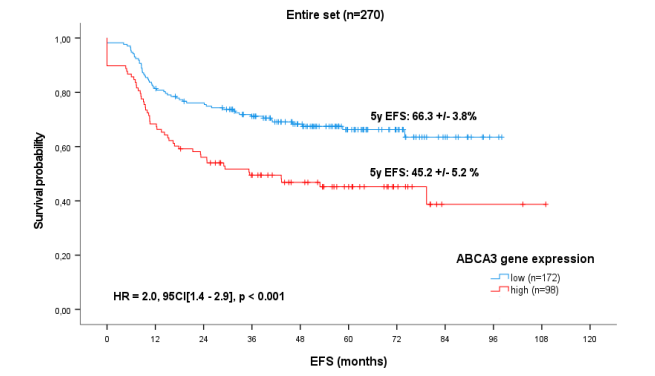

Sup Fig 2

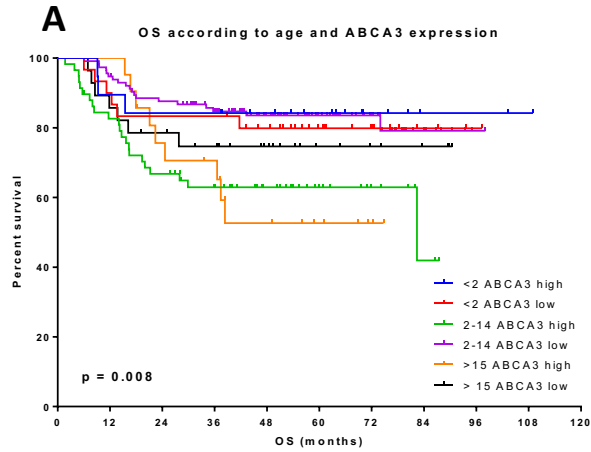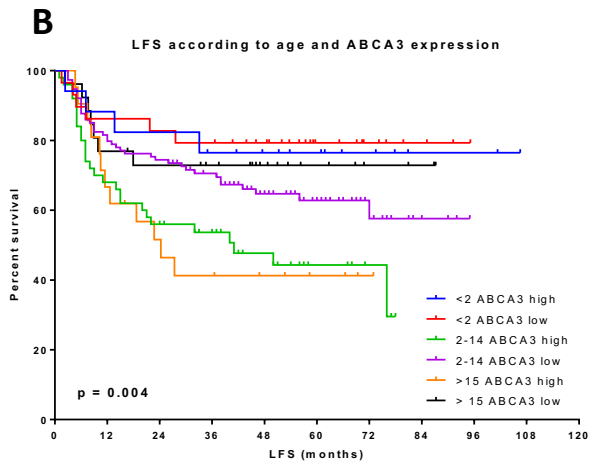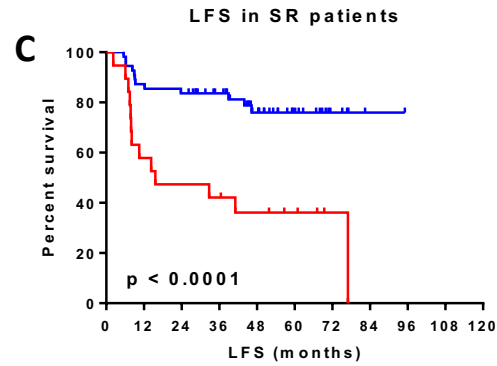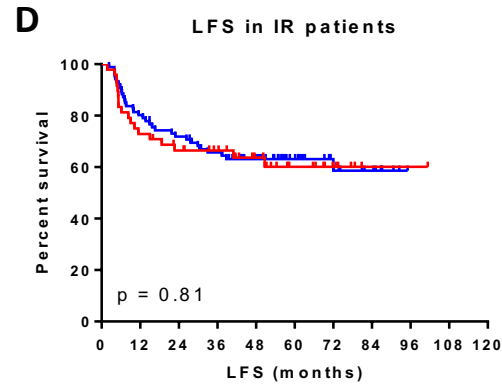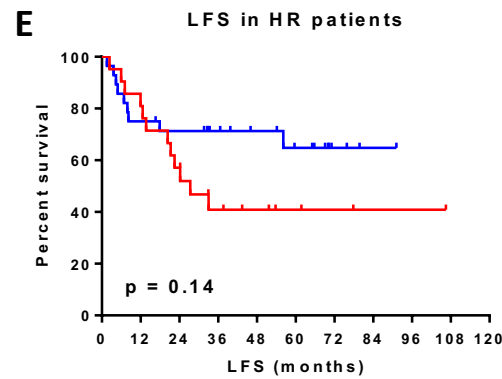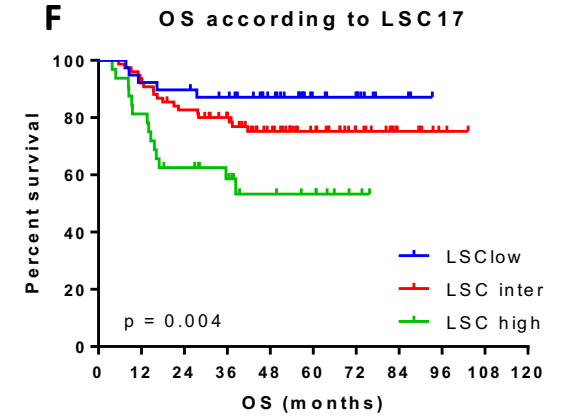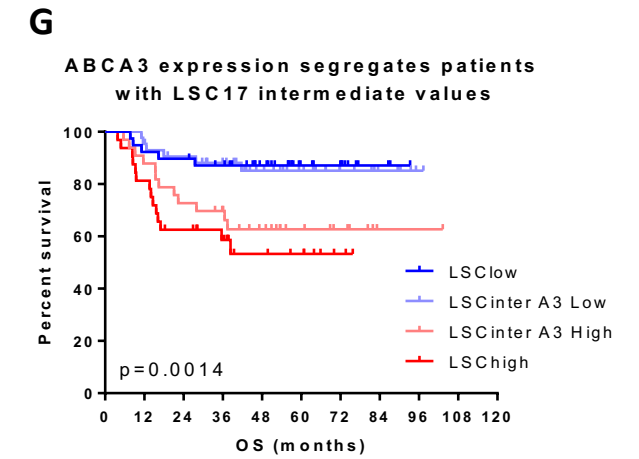

Sup Fig 3

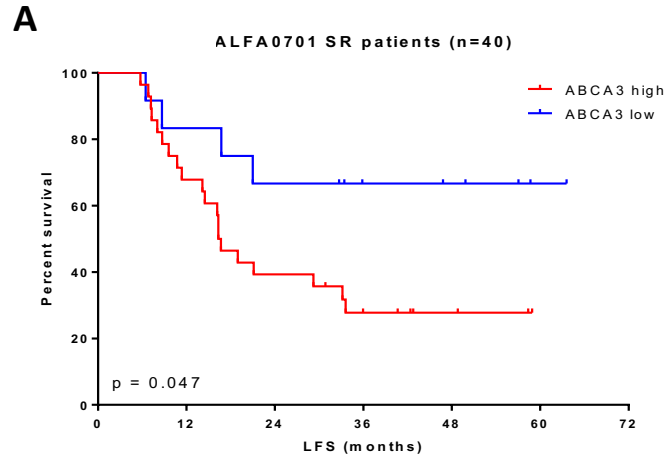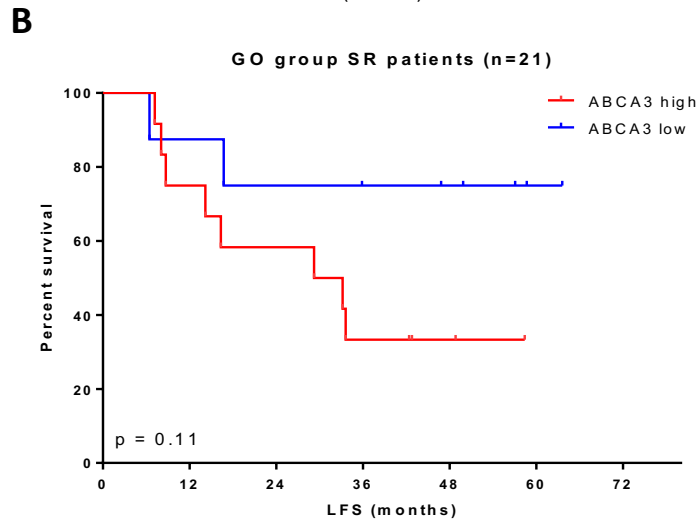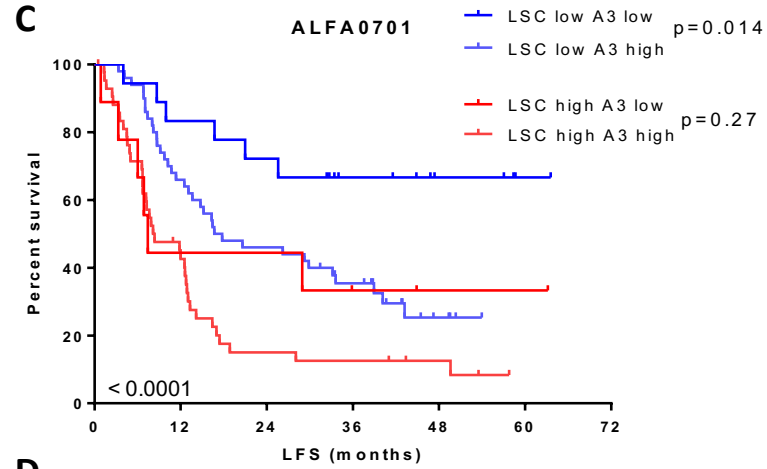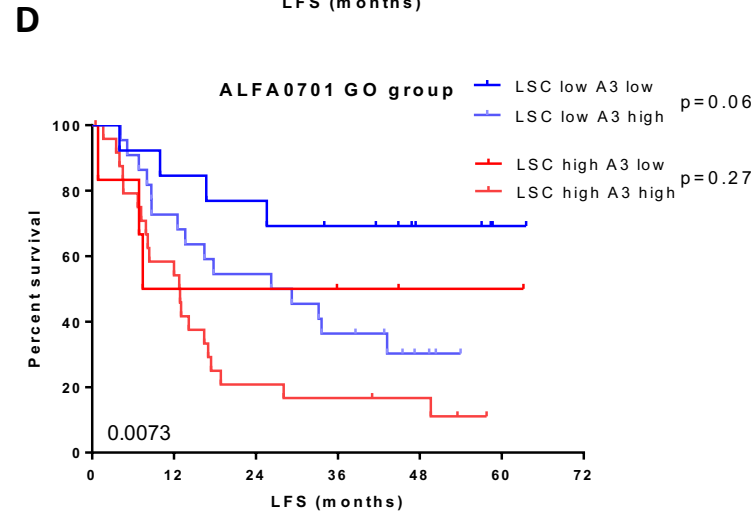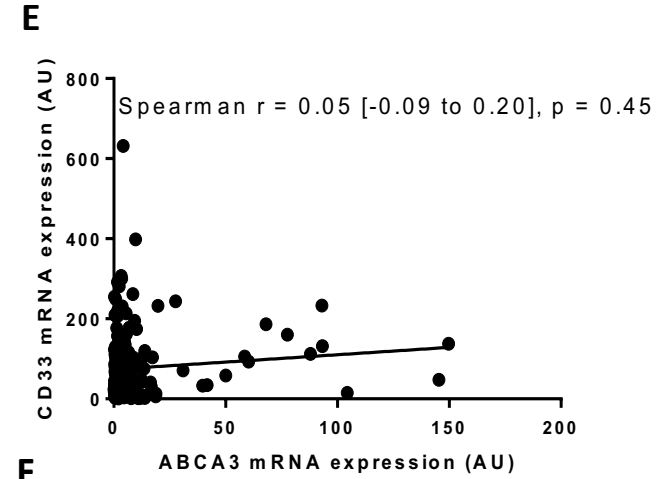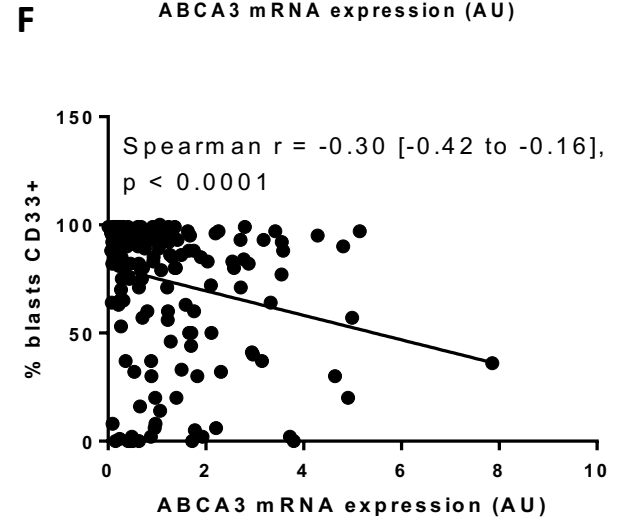

## Supplemental figures:

**Supplementary Figure 1. OS (overall survival) and EFS (event-free survival) in pediatric AML patients.** (A-B) Survival analyses in the pediatric exploratory set, (C-D) the validation set, and (E-F) the entire ELAM02 cohort. Kaplan-Meier curves and p-values of the log-ranks are shown. Statistical analyses and plots were performed using SPSS for Windows version 27.0 (IBM Corp.).

**Supplementary Figure 2. Subgroup analyses in pediatric AML.** Kaplan-Meier curves (A) OS and (B) LFS according to age (<2, 2-14, and >15 years old) and *ABCA3* expression levels. LFS in SR (standard-risk) (C), IR (intermediate risk) (D), and HR (high risk) pediatric AML patients (E) according to *ABCA3* expression levels. (F) OS in the entire pediatric cohort stratified according to LSC17 values. (G) *ABCA3* expression as a prognostic factor in patients with LSC17 intermediate values (log-rank p=0.026), Kaplan-Meier curves of respective OS. Statistical analyses and plots were performed using GraphPad Prism for Windows version 6.00 (GraphPad Software).

**Supplementary Figure 3. Subgroup analyses in adult AML.** LFS in adult SR (A) and SR GO-treated (B) AML patients according to *ABCA3* expression levels. LFS according to LSC17 values and *ABCA3* expression in (C) the ALFA0701 cohort and (D) the GO-treated group. Kaplan-Meier curves and p-values of the log-ranks are shown. Spearman rank correlation between gene expression levels of *ABCA3* and CD33 (E) and percent blast positive for CD33 expression at the cell surface (F). Statistical analyses and plots were performed using GraphPad Prism for Windows version 6.00 (GraphPad Software).
